# Supplementary material for: Modelling of Drinking Water Recarbonization in Fluidized Bed Reactor
Source: MDPI journal article supplement (doi:10.3390/pr11113209), 2023-11-10
Supplement: s1 [file s1]

## Supplementary materials

| Algorithm of Modelling of Drinking Water Recarbonization                                                                                                                                                                                                                                                                                                                                                                                                                                                                                                                                                                                                                                                                                                                                    |  |
|---------------------------------------------------------------------------------------------------------------------------------------------------------------------------------------------------------------------------------------------------------------------------------------------------------------------------------------------------------------------------------------------------------------------------------------------------------------------------------------------------------------------------------------------------------------------------------------------------------------------------------------------------------------------------------------------------------------------------------------------------------------------------------------------|--|
| <b>1. Input data</b>                                                                                                                                                                                                                                                                                                                                                                                                                                                                                                                                                                                                                                                                                                                                                                        |  |
| <ul style="list-style-type: none"> <li><math>Q(\text{H}_2\text{O}), Q(\text{CO}_2), T, S_{\text{FBRR}}, V_{\text{FBRR}}, V_{\text{VT}}, d_p, \mu, \rho_s, \rho_l</math></li> </ul>                                                                                                                                                                                                                                                                                                                                                                                                                                                                                                                                                                                                          |  |
| <b>2. Hydraulic measurements</b>                                                                                                                                                                                                                                                                                                                                                                                                                                                                                                                                                                                                                                                                                                                                                            |  |
| <ul style="list-style-type: none"> <li><math>\Delta P = f(w)</math></li> <li><math>H = f(w)</math></li> <li>minimum fluidization velocity <math>w_p</math> (Figure 1)</li> </ul>                                                                                                                                                                                                                                                                                                                                                                                                                                                                                                                                                                                                            |  |
| <b>3. Saturation kinetics of water with <math>\text{Ca}^{2+}</math> and <math>\text{Mg}^{2+}</math></b>                                                                                                                                                                                                                                                                                                                                                                                                                                                                                                                                                                                                                                                                                     |  |
| <ul style="list-style-type: none"> <li><math>\text{Ca}^{2+}, \text{Mg}^{2+}, \text{pH}, \kappa, T = f(t)</math></li> <li>Parameter values of recarbonization equation (Eq. 11)</li> <li>Mass balances – calculation of: <ul style="list-style-type: none"> <li>Rate of HCD consumption (kg/d).</li> <li>Specific production of calcium / magnesium (g/kg).</li> <li>Specific consumption of <math>\text{CO}_2</math> (g/kg).</li> </ul> </li> </ul>                                                                                                                                                                                                                                                                                                                                         |  |
| <b>4. Continuous measurements - changes of operating parameters - <math>Q(\text{CO}_2), Q(\text{H}_2\text{O})</math></b>                                                                                                                                                                                                                                                                                                                                                                                                                                                                                                                                                                                                                                                                    |  |
| <ul style="list-style-type: none"> <li><math>\text{Ca}^{2+}, \text{Mg}^{2+}, \text{pH}, \kappa, T = f(t)</math></li> <li>Multiple regression analyses: <ul style="list-style-type: none"> <li>Values of regression coefficients (Eq. 12)</li> </ul> </li> </ul>                                                                                                                                                                                                                                                                                                                                                                                                                                                                                                                             |  |
| <b>5. Optimization of recarbonation parameters</b>                                                                                                                                                                                                                                                                                                                                                                                                                                                                                                                                                                                                                                                                                                                                          |  |
| <ul style="list-style-type: none"> <li>Optimal values of independent variables <math>Q(\text{H}_2\text{O})</math> and <math>Q(\text{CO}_2)</math> for minimal and maximal values of dependent variables: <ul style="list-style-type: none"> <li><math>\text{Ca}^{2+}</math></li> <li><math>\text{Mg}^{2+}</math></li> <li><math>\text{Ca}^{2+} + \text{Mg}^{2+}</math></li> <li><math>\text{Ca}^{2+}/\text{Mg}^{2+}</math></li> </ul> </li> </ul>                                                                                                                                                                                                                                                                                                                                           |  |
| <b>6. Scaling up of recarbonization system</b>                                                                                                                                                                                                                                                                                                                                                                                                                                                                                                                                                                                                                                                                                                                                              |  |
| <ul style="list-style-type: none"> <li>Input data for scaling up: <ul style="list-style-type: none"> <li><math>Q(\text{H}_2\text{O}), Q(\text{CO}_2), T, d_p, \mu, \rho_s, \rho_l, (\text{Ca}^{2+}, \text{Mg}^{2+})_{\text{inflow}}, (\text{Ca}^{2+}, \text{Mg}^{2+})_{\text{outflow}}</math></li> </ul> </li> <li>Desing of: <ul style="list-style-type: none"> <li>Flow rate of water concentrate of <math>(\text{Ca}^{2+}, \text{Mg}^{2+})_{\text{outflow}}</math></li> <li>Volume of water tank <math>V_{\text{WT}} (\text{m}^3)</math></li> <li>Mass rate of HCD (kg/d)</li> <li>Dimensions of FBRR - <math>V_{\text{FBRR}} (\text{m}^3), S_{\text{FBRR}} (\text{m}^2), H_{\text{FBRR}} (\text{m})</math></li> <li>Mass rate of <math>\text{CO}_2</math> (kg/d)</li> </ul> </li> </ul> |  |

**Figure S1.** Algorithm of Modelling of Drinking Water Recarbonization.

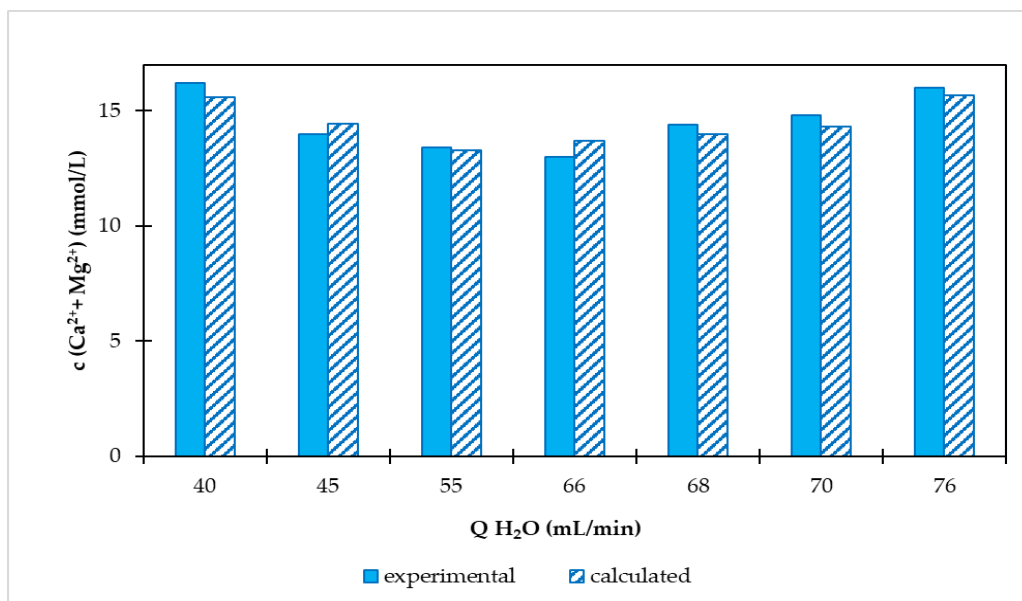

**Figure S2.** Calculated and measured concentrations of  $\text{Ca}^{2+}+\text{Mg}^{2+}$  at different flows of treated water and  $\text{CO}_2$  flow at the level of 0.5 L/min during operation of the laboratory FBRR.

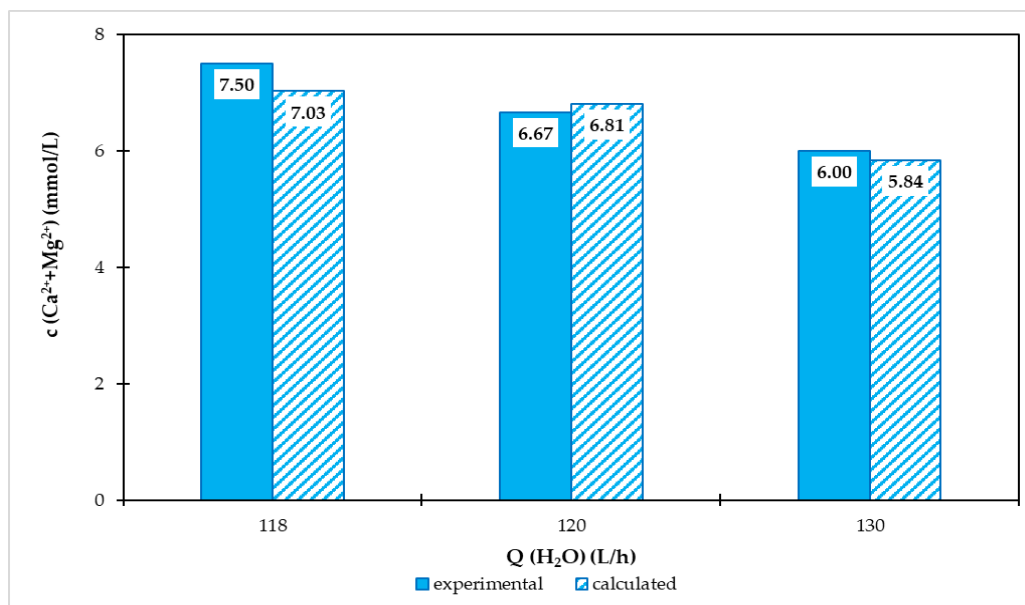

**Figure S3.** The total concentration of the sum of  $\text{Ca}^{2+}$  and  $\text{Mg}^{2+}$  ions in drinking water at  $Q(\text{CO}_2) = 0.5$  L/min.

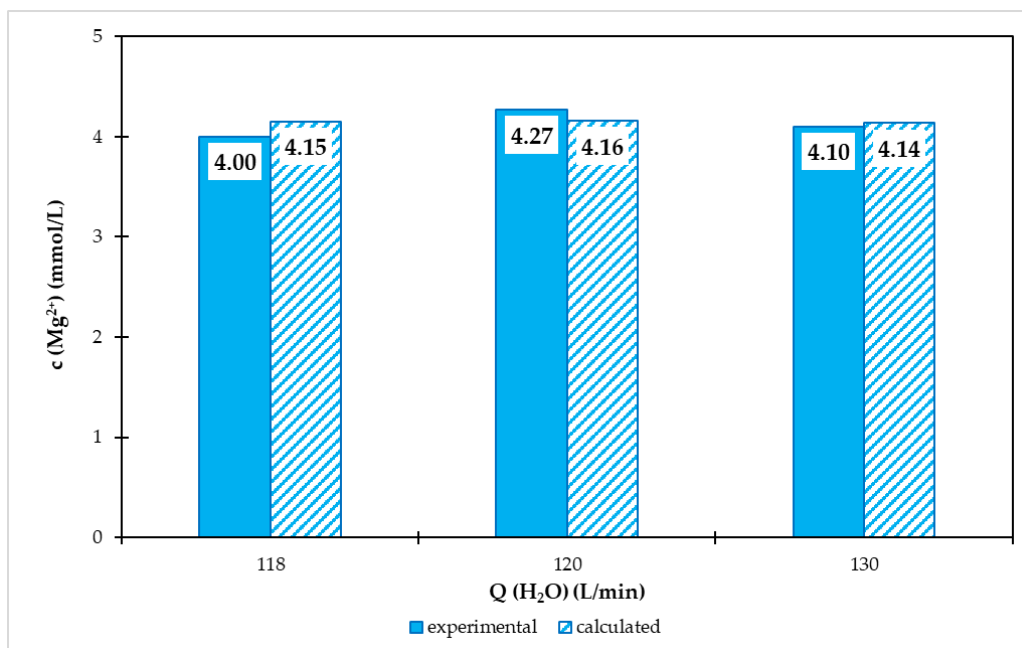

**Figure S4.** Molar concentration of  $\text{Mg}^{2+}$  in drinking water at  $Q(\text{CO}_2) = 0.5$  L/min.

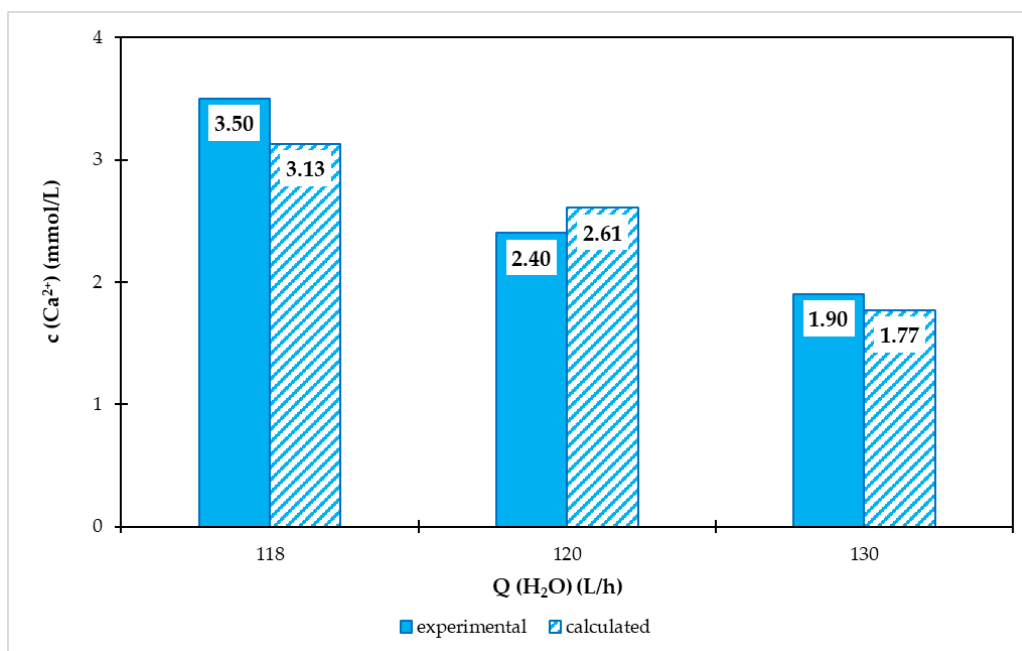

**Figure S5.** Molar concentration of  $\text{Ca}^{2+}$  in drinking water at  $Q(\text{CO}_2) = 0.5$  L/min.

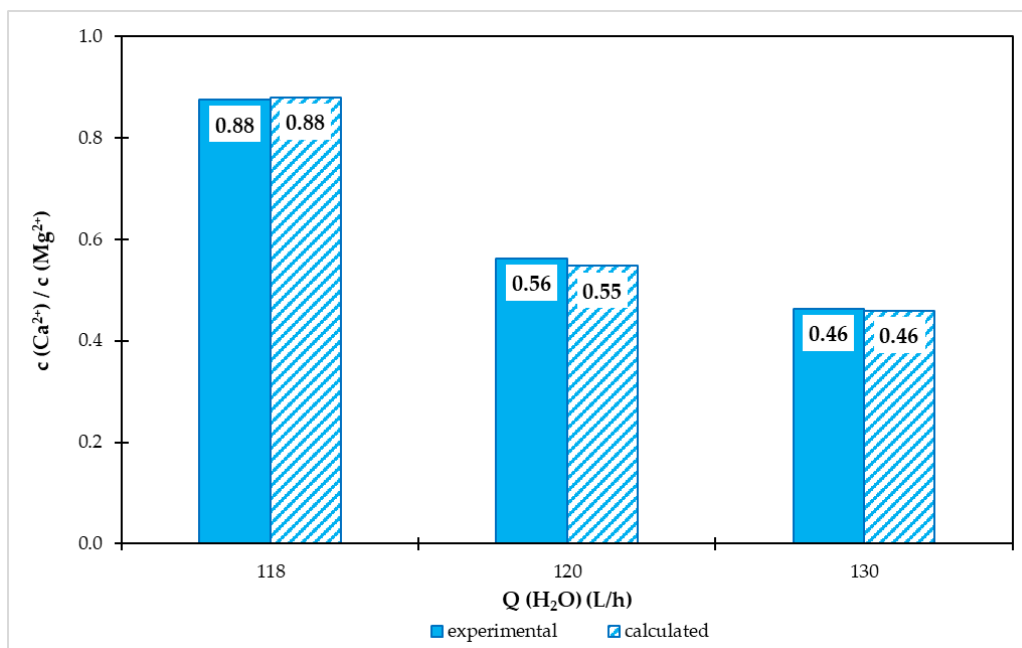

**Figure S6.** Molar concentration ration of  $\text{Ca}^{2+}$  and  $\text{Mg}^{2+}$  in drinking water at  $Q(\text{CO}_2) = 0.5 \text{ L/min}$ .

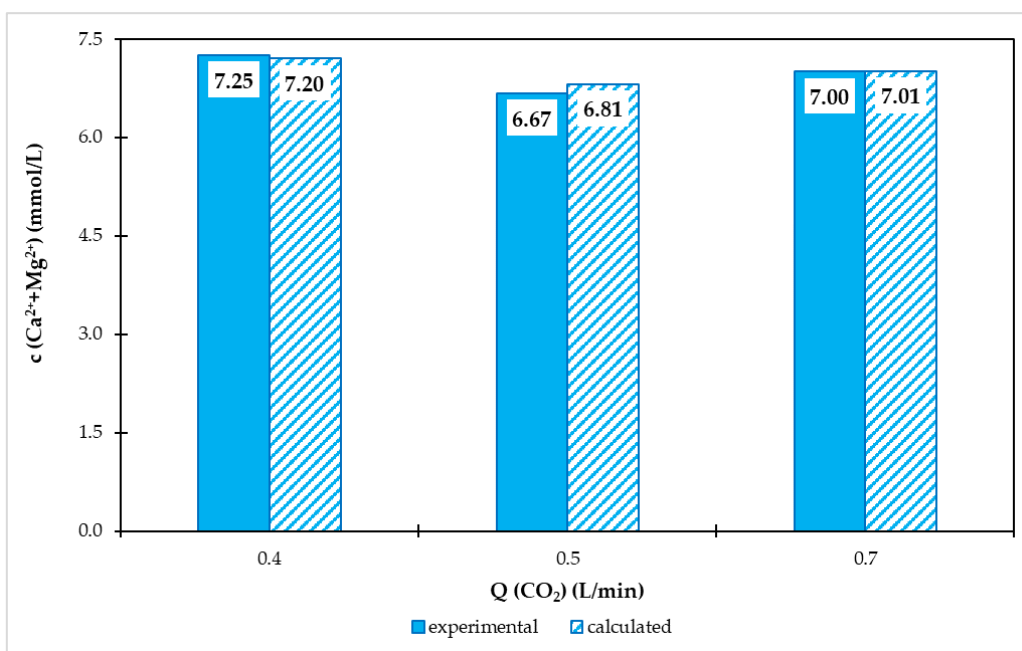

**Figure S7.** Molar concentration of the sum of  $\text{Ca}^{2+}$  and  $\text{Mg}^{2+}$  in drinking water at  $Q(\text{H}_2\text{O}) = 120 \text{ L/h}$ .

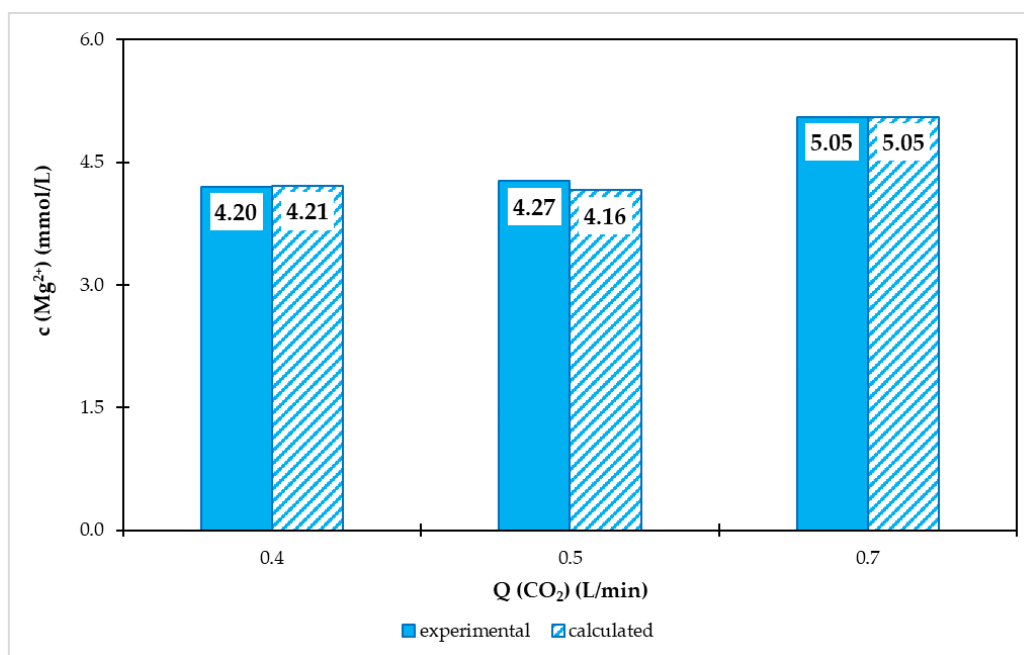

**Figure S8.** Molar concentration of the sum of Mg<sup>2+</sup> in drinking water at Q(H<sub>2</sub>O) = 120 L/h.

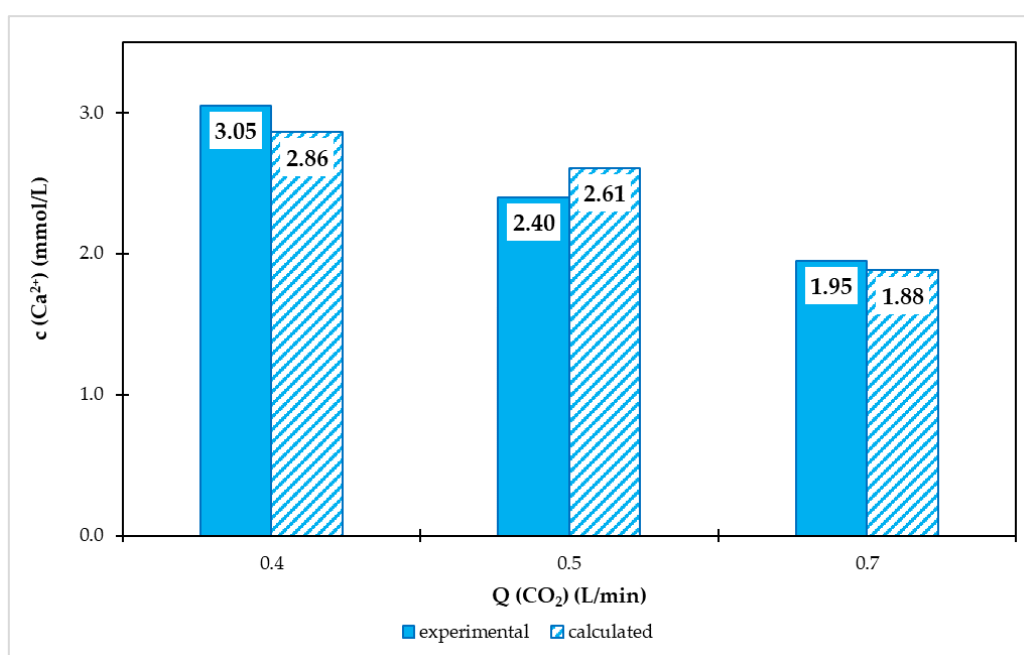

**Figure S9.** Molar concentration of the sum of Ca<sup>2+</sup> in drinking water at Q(H<sub>2</sub>O) = 120 L/h.

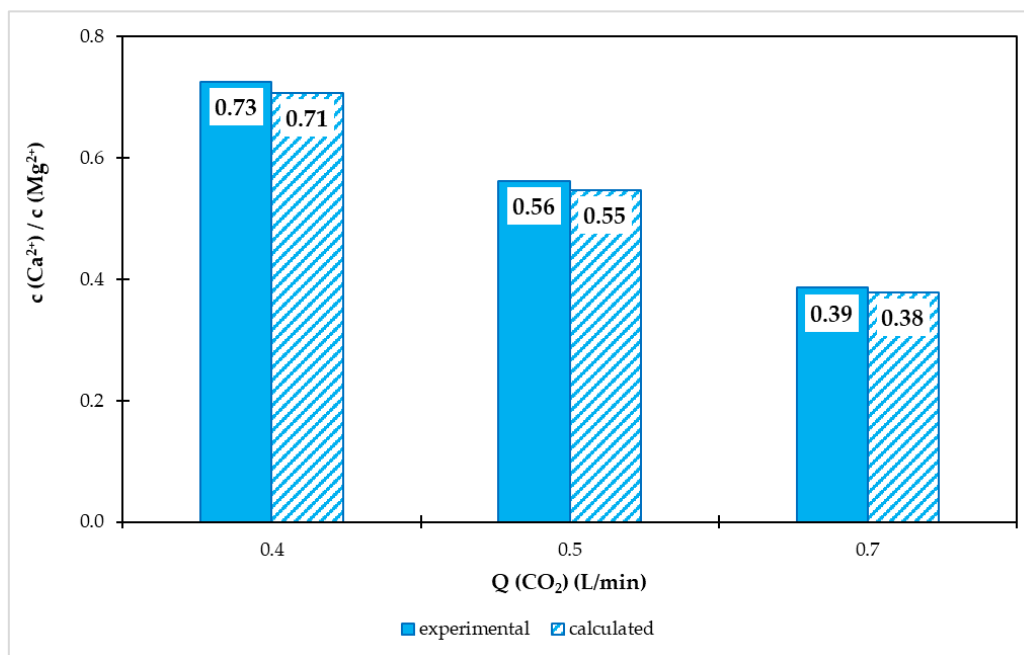

**Figure S10.** Molar ratio of  $\text{Ca}^{2+}$  and  $\text{Mg}^{2+}$  concentration in drinking water at  $Q(\text{H}_2\text{O}) = 120 \text{ L/h}$ .
