# Supplementary material for: Modelling of Drinking Water Recarbonization in Fluidized Bed Reactor
Source: MDPI journal article supplement (doi:10.3390/pr11113209), 2023-11-10
Supplement: s1 [file s1]

Archive with 1 entries (1 files):
- processes-2683001-supplementary.pdf
